# Supplementary material for: Simple Catalytic Approach for Removal of Analytical Interferences Caused by Hydrogen Peroxide in a Standard Chemical Oxygen Demand Test
Source: Atypon-hosted journal article supplement (doi:10.1061/(asce)ee.1943-7870.0001923), 2021-09-21
Supplement: supplemental_materials_ee.1943-7870.0001923_issa.pdf [file supplemental_materials_ee.1943-7870.0001923_issa.pdf]

## SUPPLEMENTAL MATERIALS

*ASCE Journal of Environmental Engineering*

# Simple Catalytic Approach for Removal of Analytical Interferences Caused by Hydrogen Peroxide in a Standard Chemical Oxygen Demand Test

Mohammad Issa, Thorben Muddemann, Dennis Haupt, Ulrich Kunz, and Michael Sievers

**DOI:** 10.1061/(ASCE)EE.1943-7870.0001923

© ASCE 2021

[www.ascelibrary.org](http://www.ascelibrary.org)

## Supplemental figures

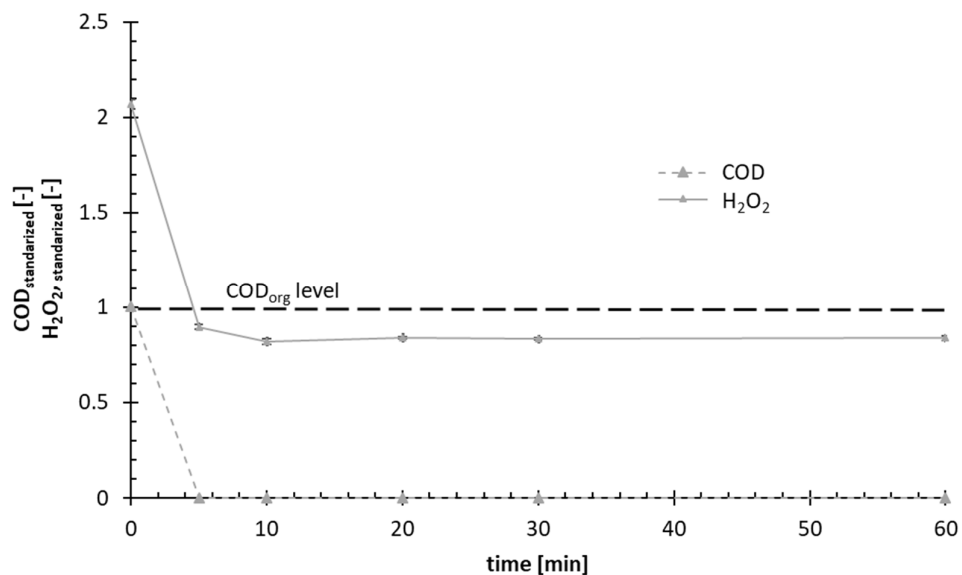

**Figure S1.** Determination of  $\text{COD}_{\text{standardized}}$  of synthetic wastewater (SWW) according to the  $\text{Na}_2\text{CO}_3$  approach (Wu and Englehardt 2012), with a ratio of 38 mol  $\text{Na}_2\text{CO}_3$  to 1 mol  $\text{H}_2\text{O}_2$ , pH 11.08, and heating at  $90^\circ\text{C}$  for 60 min.

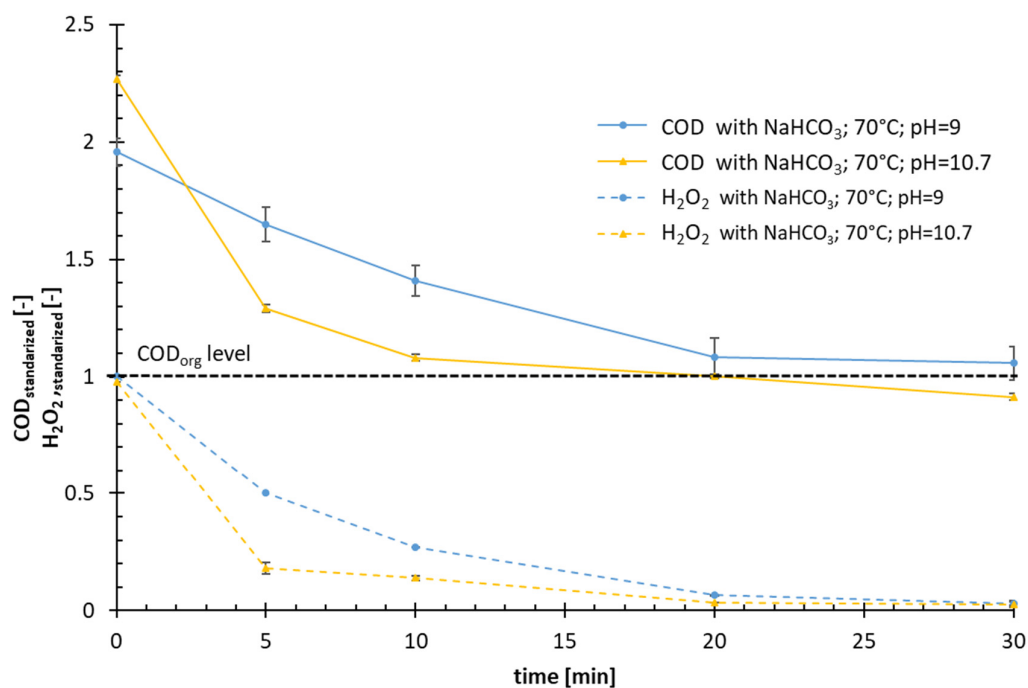

**Figure S2.** Change in H<sub>2</sub>O<sub>2</sub> decomposition and chemical oxygen demand (COD) removal caused by increasing the pH of NaHCO<sub>3</sub>-solution from 9 to 10.7 via NaOH. After pH adjustment at 10.7, H<sub>2</sub>O<sub>2</sub> was added meeting the ratio NaHCO<sub>3</sub>:H<sub>2</sub>O<sub>2</sub> = 22.5 mol/mol. H<sub>2</sub>O<sub>2</sub> and COD were observed during heating at 70°C for 30 min.

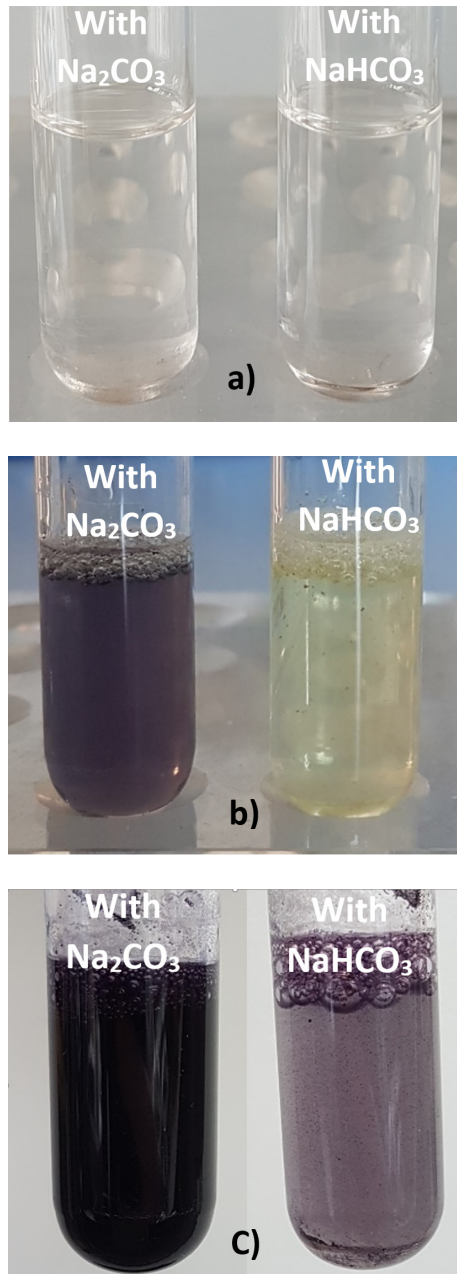

a) **Figure S3.** Color of samples after addition of nitro blue tetrazolium (NBT) to identify superoxides ( $O_2^{\bullet-}$ ) at ambient temperature ( $\sim 20^\circ C$ ): a) before NBT addition; b) after 1 min of NBT addition; and c) after 24 h of NBT addition. NBT=1.5 mM, pH=8.7 for  $NaHCO_3$ -sample, pH=11 for  $NaCO_3$ -sample.

## Supplemental tables

**Table S1.** Comparison of interference ratios in literature and this work.

| Study                    | Solution  | COD<br>[mg/L] | H <sub>2</sub> O <sub>2</sub><br>[mmol <sub>H<sub>2</sub>O<sub>2</sub>/L]</sub> | Ratio<br>[mg <sub>COD</sub> /mmol <sub>H<sub>2</sub>O<sub>2</sub>]</sub> | Reference                                                |
|--------------------------|-----------|---------------|---------------------------------------------------------------------------------|--------------------------------------------------------------------------|----------------------------------------------------------|
| Kuo (1992)               | DW*       | -             | 3.4–60.6                                                                        | 12                                                                       | (Kuo 1992)                                               |
| Talinli et al. (1992)    | Glucose   | 230–906       | 7.4–29.4                                                                        | 10.1–8.5                                                                 | (Talinli and Anderson 1992)                              |
| Kang et al. (1999)       | KHP*      | 102–498       | 2.9–44.1                                                                        | 23.8–14.1                                                                | (Kang et al. 1999)                                       |
| Lee et al. (2011)        | KHP       | 0–1000        | 0.88–5.6                                                                        | 19.7                                                                     | (Lee et al. 2011)                                        |
|                          | livestock | 0–400         | 0.88–2.9                                                                        | 17.7                                                                     |                                                          |
| Wu et al. (2012)         | MSE***    | 30–40         | 1–5                                                                             | 17.4                                                                     | (Wu and Englehardt 2012)                                 |
| Chavoshani et al. (2016) | Leachate  | 610           | 10 - 40                                                                         | 16.7                                                                     | (Afsane Chavoshani. Aezam Rostami. Fahimeh Golzari 2016) |
| This work                | SWW       | 1192          | 44.5                                                                            | 16.91                                                                    |                                                          |
|                          | Leachate  | 1328          | 44.5                                                                            | 11.20                                                                    |                                                          |
|                          | MPE       | 180           | 44.5                                                                            | 16.46                                                                    |                                                          |
|                          | CID       | 45            | 44.5                                                                            | 17.25                                                                    |                                                          |

\* Deionized water; \*\* Potassium hydrogen phthalate; \*\*\* Municipal secondary effluent (MSE)

**Table S2.** Data of side-by-side comparison approach via NaHCO<sub>3</sub> and Na<sub>2</sub>CO<sub>3</sub>.

|                                        | time [min]                           | Exp. 1 | Exp. 2 | Exp. 3 | Exp. 4 | mean value | SD    |      |
|----------------------------------------|--------------------------------------|--------|--------|--------|--------|------------|-------|------|
| H <sub>2</sub> O <sub>2</sub> [mmol/L] | With NaHCO <sub>3</sub>              | 0      | 95     | 80     | 83     | 88         | 87    | 7    |
|                                        |                                      | 5      | 73     | 79     | 80     | 70         | 76    | 5    |
|                                        |                                      | 10     | 45     | 46     | 30     | 44         | 41    | 8    |
|                                        |                                      | 20     | 17     | 18     | 19     | 18         | 18    | 1    |
|                                        |                                      | 30     | 0      | 0      | 0      | 0          | 0     | 0    |
|                                        |                                      | 60     | 0      | 0      | 0      | 0          | 0     | 0    |
|                                        | With Na <sub>2</sub> CO <sub>3</sub> | 0      | 91     | 88     | 86     | 88         | 89    | 2    |
|                                        |                                      | 5      | 8      | 9      | 13     | 6          | 9     | 3    |
|                                        |                                      | 10     | 0      | 0      | 0      | 0          | 0     | 0    |
|                                        |                                      | 20     | 0      | 0      | 0      | 0          | 0     | 0    |
|                                        |                                      | 30     | 0      | 0      | 0      | 0          | 0     | 0    |
|                                        |                                      | 60     | 0      | 0      | 0      | 0          | 0     | 0    |
| COD* [mg/L]                            | With NaHCO <sub>3</sub>              | 0      | 2700   | 2680   | 2644   | 2660       | 2671  | 24   |
|                                        |                                      | 5      | 2380   | 2400   | 2456   | 2424       | 2415  | 33   |
|                                        |                                      | 10     | 1912   | 1872   | 1960   | 1976       | 1930  | 47   |
|                                        |                                      | 20     | 1428   | 1440   | 1468   | 1480       | 1454  | 24   |
|                                        |                                      | 30     | 1276   | 1236   | 1278   | 1296       | 1272  | 25   |
|                                        |                                      | 60     | 1120   | 1136   | 1124   | 1180       | 1140  | 28   |
|                                        | With Na <sub>2</sub> CO <sub>3</sub> | 0      | 2648   | 2656   | 2412   | 2688       | 2601  | 127  |
|                                        |                                      | 5      | 1312   | 1420   | 1278   | 1260       | 1318  | 72   |
|                                        |                                      | 10     | 1188   | 1180   | 1138   | 1160       | 1167  | 22   |
|                                        |                                      | 20     | 1084   | 1108   | 1054   | 1076       | 1081  | 22   |
|                                        |                                      | 30     | 1044   | 1016   | 1050   | 992        | 1026  | 27   |
|                                        |                                      | 60     | 976    | 976    | 1012   | 972        | 984   | 19   |
| pH                                     | With NaHCO <sub>3</sub>              | 0      | 8.64   | 8.40   | 8.66   | 8.81       | 8.63  | 0.17 |
|                                        |                                      | 5      | 8.61   | 8.60   | 8.66   | 8.72       | 8.65  | 0.06 |
|                                        |                                      | 10     | 8.63   | 8.69   | 8.69   | 8.78       | 8.70  | 0.06 |
|                                        |                                      | 20     | 8.65   | 8.74   | 8.74   | 8.81       | 8.74  | 0.07 |
|                                        |                                      | 30     | 8.61   | 8.69   | 8.71   | 8.76       | 8.69  | 0.06 |
|                                        |                                      | 60     | 8.66   | 8.65   | 8.70   | 8.79       | 8.70  | 0.06 |
|                                        | With Na <sub>2</sub> CO <sub>3</sub> | 0      | 11.00  | 10.93  | 11.03  | 11.05      | 11.00 | 0.05 |
|                                        |                                      | 5      | 11.08  | 11.08  | 11.06  | 11.02      | 11.06 | 0.03 |
|                                        |                                      | 10     | 11.04  | 11.05  | 11.00  | 10.97      | 11.02 | 0.04 |
|                                        |                                      | 20     | 11.02  | 11.03  | 10.96  | 10.98      | 11.00 | 0.03 |
|                                        |                                      | 30     | 10.99  | 10.98  | 10.97  | 10.95      | 10.97 | 0.02 |
|                                        |                                      | 60     | 10.97  | 10.95  | 10.96  | 10.96      | 10.96 | 0.01 |

\*COD of the original solution SWW is COD<sub>org</sub>=1195 mg/L

## References

- Afsane Chavoshani, Aezam Rostami, Fahimeh Golzari, A. G. (2016). "The Effect of H<sub>2</sub>O<sub>2</sub> Interference in Chemical Oxygen Demand Removal During Advanced Oxidation Processes." *Iranian Journal of Health, Safety and Environment*, 3(3), 565–569.
- Kang, Y. W., Cho, M. J., and Hwang, K. Y. (1999). "Correction of hydrogen peroxide interference on standard chemical oxygen demand test." *Water Research*.  
[https://doi.org/10.1016/S0043-1354\(98\)00315-7](https://doi.org/10.1016/S0043-1354(98)00315-7).
- Kuo, W. G. (1992). "Decolorizing dye wastewater with Fenton's reagent." *Water Research*, 26(7), 881–886. [https://doi.org/10.1016/0043-1354\(92\)90192-7](https://doi.org/10.1016/0043-1354(92)90192-7).
- Lee, E., Lee, H., Kim, Y. K., Sohn, K., and Lee, K. (2011). "Hydrogen peroxide interference in chemical oxygen demand during ozone based advanced oxidation of anaerobically digested livestock wastewater." *J. Environ. Sci. Tech*, 8(2), 381–388.  
<https://doi.org/10.1007/BF03326225>.
- Talinli, I., and Anderson, G. K. (1992). "Interference of hydrogen peroxide on the standard COD test." *Water Research*, 26(1), 107–110. [https://doi.org/10.1016/0043-1354\(92\)90118-N](https://doi.org/10.1016/0043-1354(92)90118-N).
- Wu, T., and Englehardt, J. D. (2012). "A new method for removal of hydrogen peroxide interference in the analysis of chemical oxygen demand." *Environmental Science and Technology*, 46(4), 2291–2298. <https://doi.org/10.1021/es204250k>.
